# Supplementary material
Source: publisher figshare collection journal article supplement (https://acs.figshare.com/ndownloader/files/14919698)
Supplement: Supplementary file 1 [file 14919698]

## Supporting Information

# Multiporous Terbium Phosphonate Coordination Polymer Microspheres as Fluorescent Probe for Trace Anthrax Biomarker Detection

*Yongquan Luo,<sup>†</sup> Lei Zhang,<sup>\*†</sup> Lingyi Zhang,<sup>†</sup> Bohao Yu,<sup>†</sup> Yajie Wang,<sup>‡</sup> and Weibing Zhang<sup>\*†</sup>*

<sup>†</sup> Shanghai Key Laboratory of Functional Materials Chemistry, School of Chemistry & Molecular Engineering, East China University of Science and Technology, Shanghai 200237, China.

<sup>‡</sup> Department of Pharmacy, Anhui Medical College, Hefei, 230601, China

\*E-mail: leizhang595@ecust.edu.cn. Tel: 86-21-64252942. Fax: 86-21-64252947.

\*E-mail: weibingzhang@ecust.edu.cn Tel: 86-21-64252145. Fax: 86-21-64233161.

## Contents

### Material characterization

**Table S1.** The comparison of different fluorescent probe for DPA detection

**Figure S1.** Energy Dispersive Spectrometer (EDS) spectrum of the TbP-CPs

**Figure S2.** The XPS spectrum of the TbP-CPs

**Figure S3.** XPS spectra of O element (a), N element (b) and Tb element (c) before (black curve) and after (red curve) the addition of DPA

**Figure S4.** Fluorescent emission decay curves of TbP-CPs and with 5  $\mu$ M DPA at 544 nm (Decay curve of Tb-CPs , black curve; Decay fitted curve of Tb-CPs , blue curve; Decay curve of Tb-CPs+PDA , purple curve; Decay fitted curve of Tb-CPs+PDA , red curve)

**Figure S5.** Effects of pH values on fluorescence intensity of TbP-CPs with 2.0  $\mu$ M DPA (red curve) and without DPA (black curve) in NaAc-HAc buffer (200 mM, pH 5.0)

**Figure S6.** Effects of interaction time on fluorescence intensity of TbP-CPs with 2.0  $\mu$ M DPA in NaAc-HAc buffer (200 mM, pH 5.0)

**Figure S7.** The stability of 0.3 mg/mL TbP-CPs suspension solution in NaAc-HAc buffer (200 mM, pH 5.0)

## **Material characterization**

The structure and morphology of multiporous terbium phosphonate coordination polymers microspheres (TbP-CPs) were characterized by ultrahigh resolution field emission scanning electron microscopy (UHRFESEM, NOVA Nano SEM450, FEI, USA) and ultrahigh resolution transmission electron microscope (HR-TEM, JEM-2100, JEOL, Japan). The X-ray photoelectron spectra were obtained using an ESCALAB 250Xi X-ray photoelectron spectrometer (XPS, USA). The specific surface area of TbP-CPs was calculated by the Brunauer-Emmett-Teller (BET) method. Nitrogen sorption/desorption isotherm was performed on a Micromeritics Instrument Corporation TriStar II 3020 (USA) at 77 K. Before the sorption/desorption measurement, the TbP-CPs were degassed in a vacuum at 300 °C for 10 h. The pore size distribution (PSD) was calculated based on the adsorption branch with the Barrett-Joyner-Halenda (BJH) model. The FTIR spectrum of TbP-CPs was characterized (Nicolet 6700 FTIR, Thermo, USA) using the KBr pellet method. Thermogravimetric analysis (TGA) was performed in a nitrogen atmosphere at a heating rate of 10 °C min<sup>-1</sup> from 40 °C to 800 °C (Pyris Diamond, PerkinElmer, USA). Then, the fluorescence spectra for TbP-CPs as fluorescence probe was measured with a Lumina Fluorescence Spectrometer (Thermo Scientific). Finally, the fluorescence lifetime of TbP-CPs was measured with a Fluorescence Spectrofluorometer (FLS980, Edinburgh Instruments, UK).

**Table S1** The comparison of different fluorescent probe for DPA detection

| Fluorescent probes                                             | Detection limit<br>(nM) | Linear range<br>( $\mu$ M) | Refs.     |
|----------------------------------------------------------------|-------------------------|----------------------------|-----------|
| Tb/Eu@bio-MOF                                                  | 34                      | 0.05-1                     | [1]       |
| SiO <sub>2</sub> -Tb-EDTA                                      | 10.3                    | 0-12                       | [2]       |
| CDs-Tb                                                         | 0.1                     | 0.0005-2.5                 | [3]       |
| CDs-Cu <sup>2+</sup> systems                                   | 79                      | 0.25-20                    | [4]       |
| CDs/Eu-NCPs                                                    | 5.1                     | 0.025-5                    | [5]       |
| Automated anthrax smoke detector                               | 0.2                     | 0.01-0.1                   | [6]       |
| Eu-Gd(BDC)1.5(H <sub>2</sub> O) <sub>2</sub> @SiO <sub>2</sub> | 48                      | /                          | [7]       |
| AMP/Tb                                                         | 10                      | 0.02-20                    | [8]       |
| LnAg NPs                                                       | 12.3                    | 0.04-10                    | [9]       |
| TbP-CPs                                                        | 5.0                     | 0-8                        | This work |

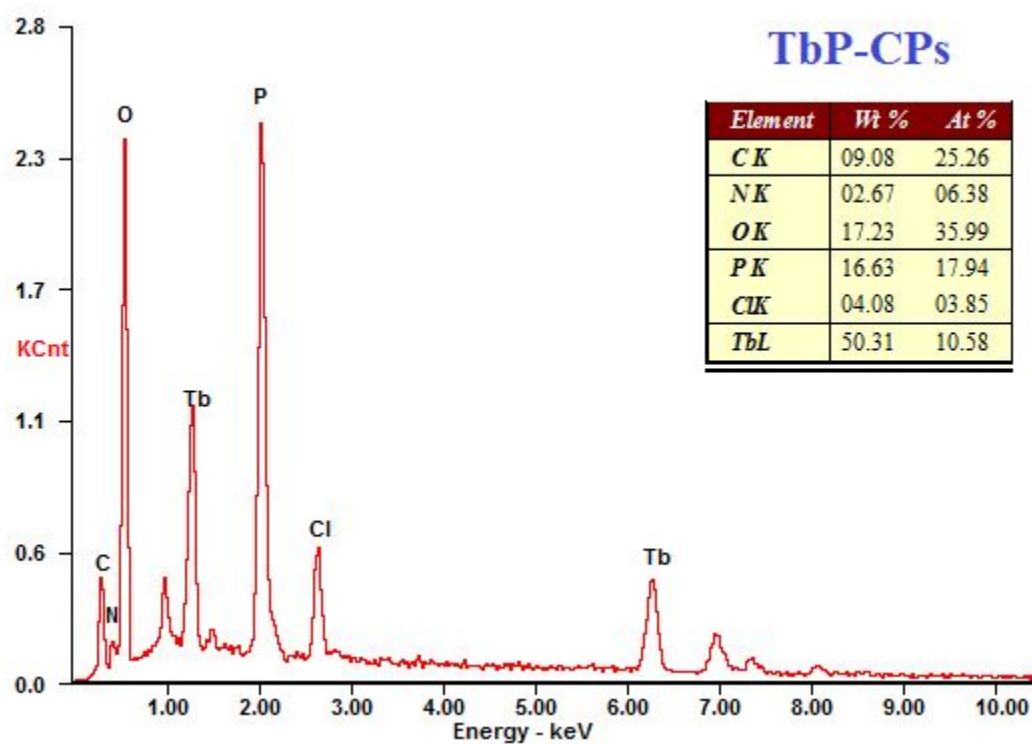

**Figure S1.** Energy Dispersive Spectrometer (EDS) spectrum of the TbP-CPs

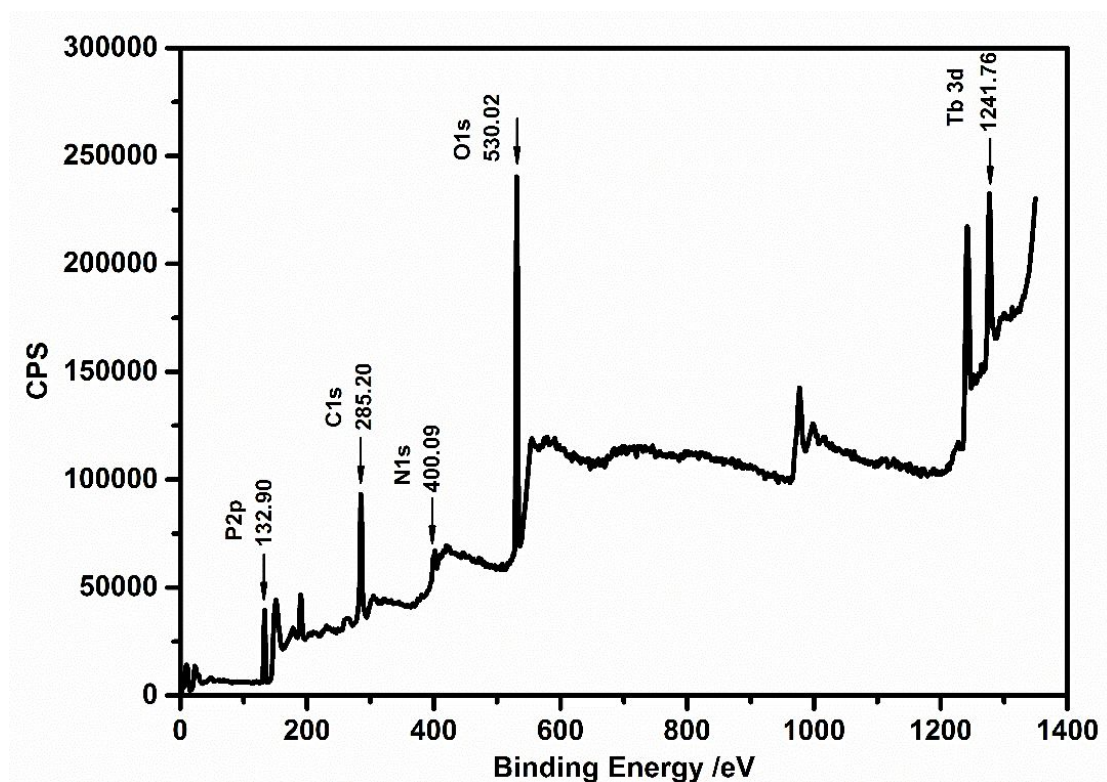

**Figure S2.** The XPS spectrum of the TbP-CPs

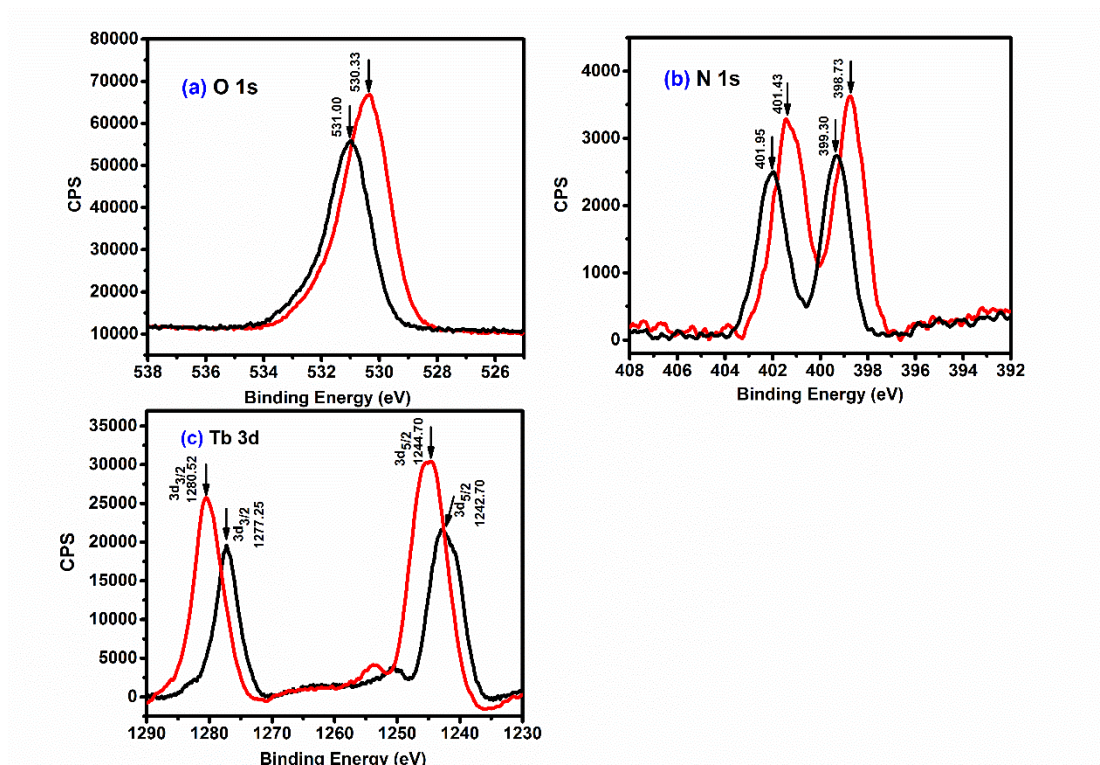

**Figure S3.** XPS spectra of O element (a), N element (b) and Tb element (c) before (black curve) and after (red curve) the addition of DPA

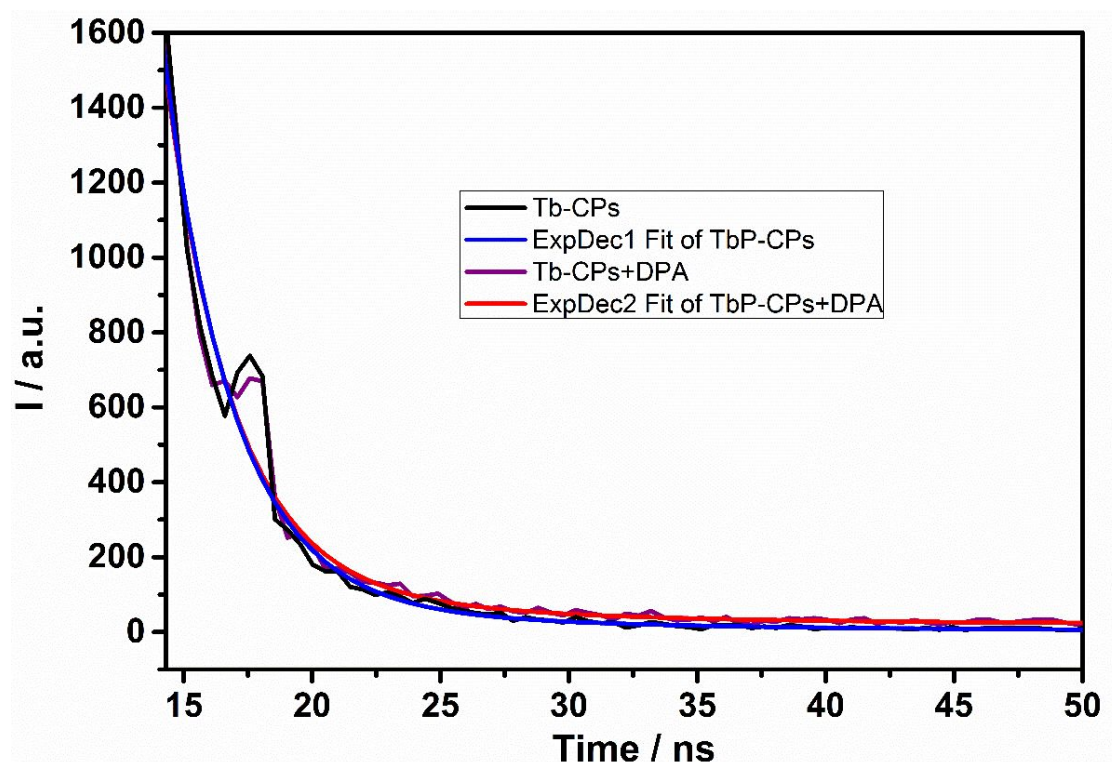

**Figure S4.** Fluorescent emission decay curves of TbP-CPs and with 5  $\mu$ M DPA at 544 nm (Decay curve of Tb-CPs , Black curve; Decay fitted curve of Tb-CPs , Blue curve; Decay curve of Tb-CPs+PDA , Purple curve; Decay fitted curve of Tb-CPs+PDA , Red curve)

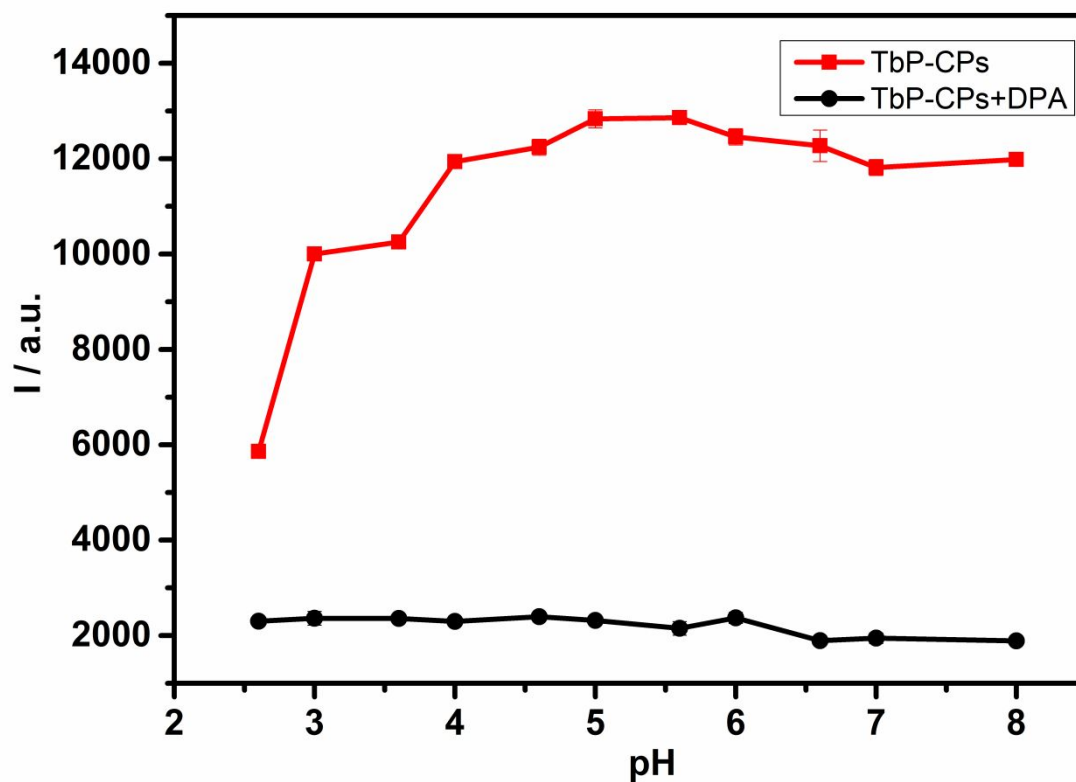

**Figure S5.** Effects of pH values on fluorescence intensity of TbP-CPs with 2.0  $\mu$ M DPA (red curve) and without DPA (black curve) in NaAc-HAc buffer (200 mM, pH 5.0)



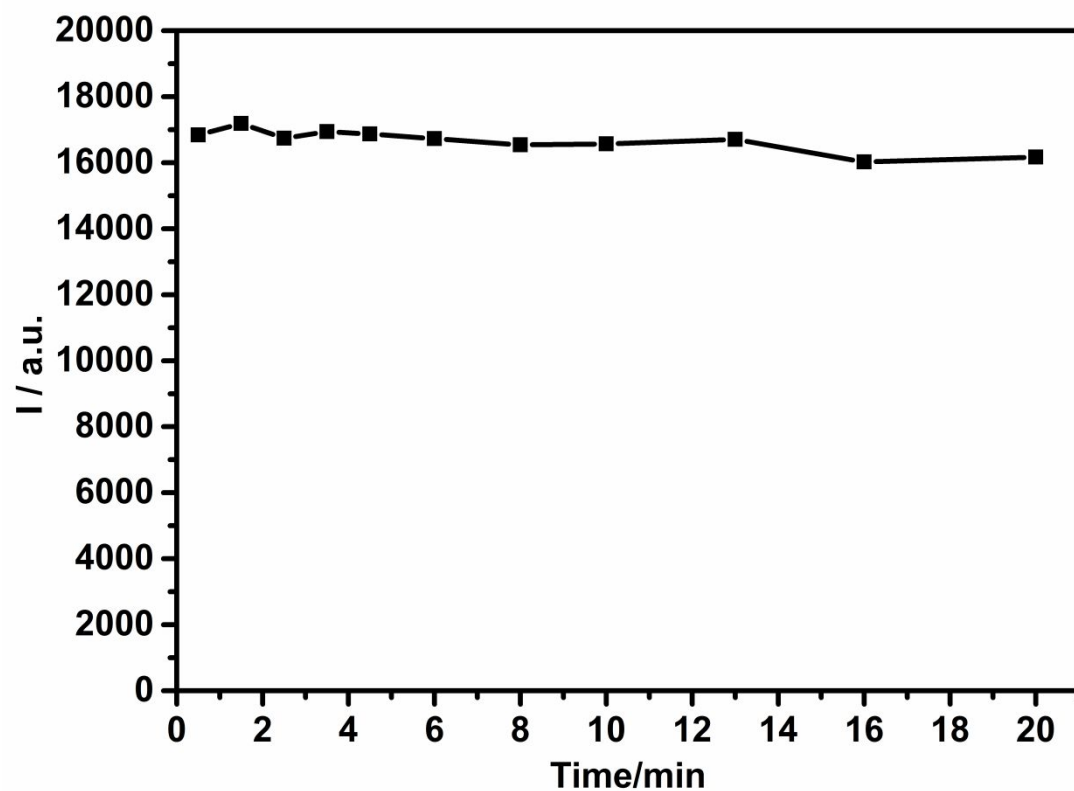

**Figure S6.** Effects of interaction time on fluorescence intensity of TbP-CPs with 2.0  $\mu\text{M}$  DPA in NaAc-HAc buffer (200 mM, pH 5.0)

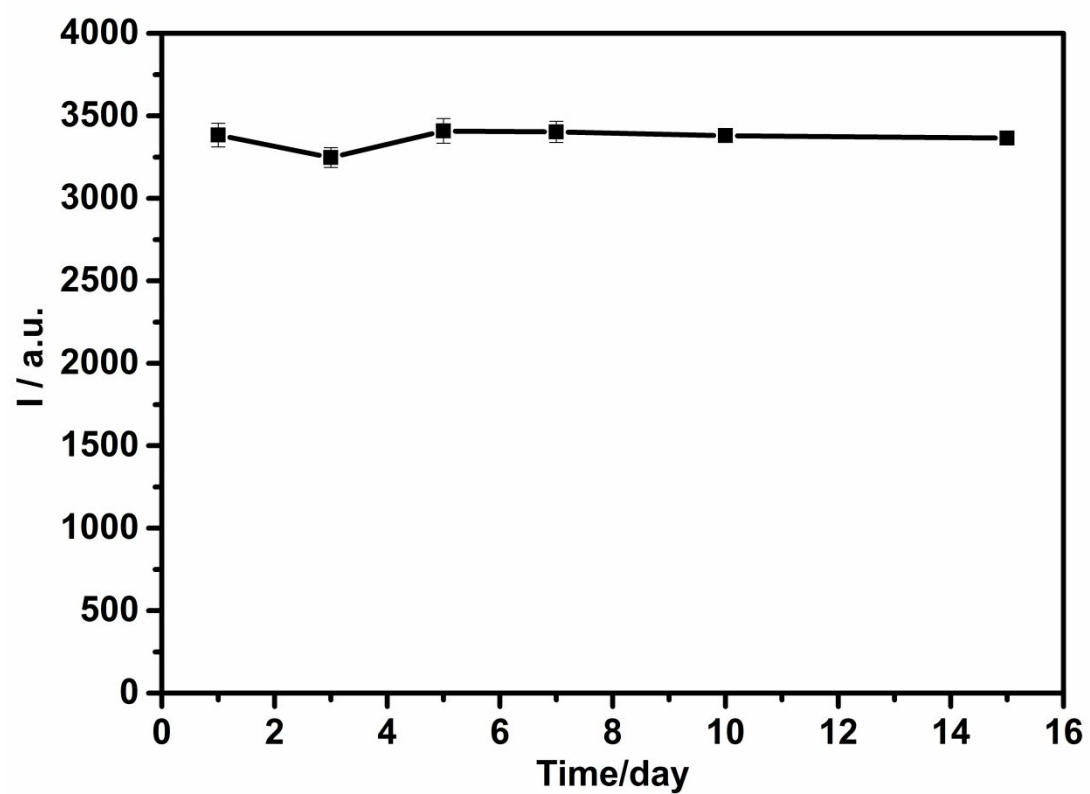

**Figure S7.** The stability of 0.3 mg/mL TbP-CPs suspension solution in NaAc-HAc buffer (200 mM, pH 5.0)

## REFERENCES

- [1] Zhang, Y.; Li, B.; Ma, H.; Zhang, L.; Zheng, Y. Rapid and Facile Ratiometric Detection of an Anthrax Biomarker by Regulating Energy Transfer Process in Bio-metal-Organic Framework. *Biosens. Bioelectron.* 2016, 85, 287-293.
- [2] Taylor, K. M. L.; Lin, W. B. Hybrid Silica Nanoparticles for Luminescent Spore Detection. *J. Mater. Chem.* 2009, 19, 6418-6422.
- [3] Liu, M. L.; Chen, B. B.; He, J. H.; Li, C. M.; Li, Y. F.; Huang, C. Z. Anthrax Biomarker: An Ultrasensitive Fluorescent Ratiometry of Dipicolinic Acid by Using Terbium(III)-Modified Carbon Dots. *Talanta* 2019, 191, 443-448.
- [4] Li, P. J.; Ang, A. N.; Feng, H. T.; Li, S. F. Y. Rapid Detection of an Anthrax Biomarker Based on the Recovered Fluorescence of Carbon Dot–Cu(II) Systems. *J. Mater. Chem. C* 2017, 5, 6962-6972.
- [5] Song, Y. H.; Chen, J. Y.; Hu, D. Q.; Liu, F. F.; Li, P.; Li, H. B.; Chen, S. H.; Tan, H. L.; Wang, L. Ratiometric Fluorescent Detection of Biomakers for Biological Warfare Agents with Carbon Dots Chelated Europium-Based Nanoscale Coordination Polymers. *Sens. Actuators. B* 2015, 221, 586-592.
- [6] Yung, P. T.; Lester, E. D.; Bearman, G.; Ponce, A. An Automated front-end Monitor for Anthrax Surveillance Systems Based on the Rapid Detection of Airborne Endospores. *Biotechnol. Bioeng.* 2007, 98, 864-871.
- [7] Rieter, W. J.; Taylor, K. M.; Lin, W. Surface Modification and Functionalization of Nanoscale Metal-Organic Frameworks for Controlled Release and Luminescence Sensing. *J. Am. Chem. Soc.* 2007, 129, 9852-9853.
- [8] Tan, H. L.; Ma, C. J.; Chen, L. L.; Xu, F. G.; Chen, S. H.; Wang, L. Nanoscaled Lanthanide/Nucleotide Coordination Polymer for Detection of an Anthrax Biomarker. *Sens. Actuators. B* 2014, 190, 621-626.
- [9] Tan, H. L.; Li, Q.; Ma, C. J.; Song, Y. H.; Xu, F. G.; Chen, S. H.; Wang, L. Lanthanide-Functionalized Silver Nanoparticles for Detection of an Anthrax Biomarker and Test Paper Fabrication. *J Nanopart. Res.* 2014, 16, 2151-2162.
